# Supplementary material
Source: publisher figshare collection journal article supplement (https://sage.figshare.com/ndownloader/files/18046154)
Supplement: Supplementary file 1 [file 18046154]

Archive with 1 entries (1 files):
- 18046154.out
